# Supplementary material for: Large-Scale Cu Nanowire Synthesis by PVP-Ethylene Glycol Route
Source: Hindawi journal article supplement (doi:10.1155/2018/1698357), 2018-08-08
Supplement: f1 [file 1698357.f1.docx]

# Supplementary Materials

**Large-scale Cu Nanowire Synthesis by PVP-Ethylene Glycol Route**

Jhon L. Cuya Huaman,1 Iori Urushizaki,1 Balachandran Jeyadevan1

1 Department of Material Science, School of Engineering, The University of Shiga Prefecture, Hikone, Japan. Fax: 81 749 28 8486; Tel: 81 749 28 8352.

Corresponding authors: Jhon L. Cuya Huaman; [cuya.j@office.usp.ac.jp](mailto:cuya.j@office.usp.ac.jp), Balachandran Jeyadevan: jeyadevan.b@mat.usp.ac.jp

Figure S1: XRD pattern and SEM image of the collected powders obtained at high CTAC concentration (5 mM) showing the presence of CuCl crystals with triangular shape.

Figure S2: XRD pattern of the powders synthesized using different halide sources at a concentration of 1.25 mM.

Figure S3: XRD patterns of the powder obtained after reaching at different reaction temperatures.

Figure S4: XRD pattern and SEM image of the powder obtained after reaching at 174 oC for 10 h.
